# Supplementary material for: Systematical analysis reveals a strong cancer relevance of CREB1-regulated genes
Source: PubMed Central journal article supplement (PMC8507136; doi:10.1186/s12935-021-02224-z), 2021-10-12

Figure S1

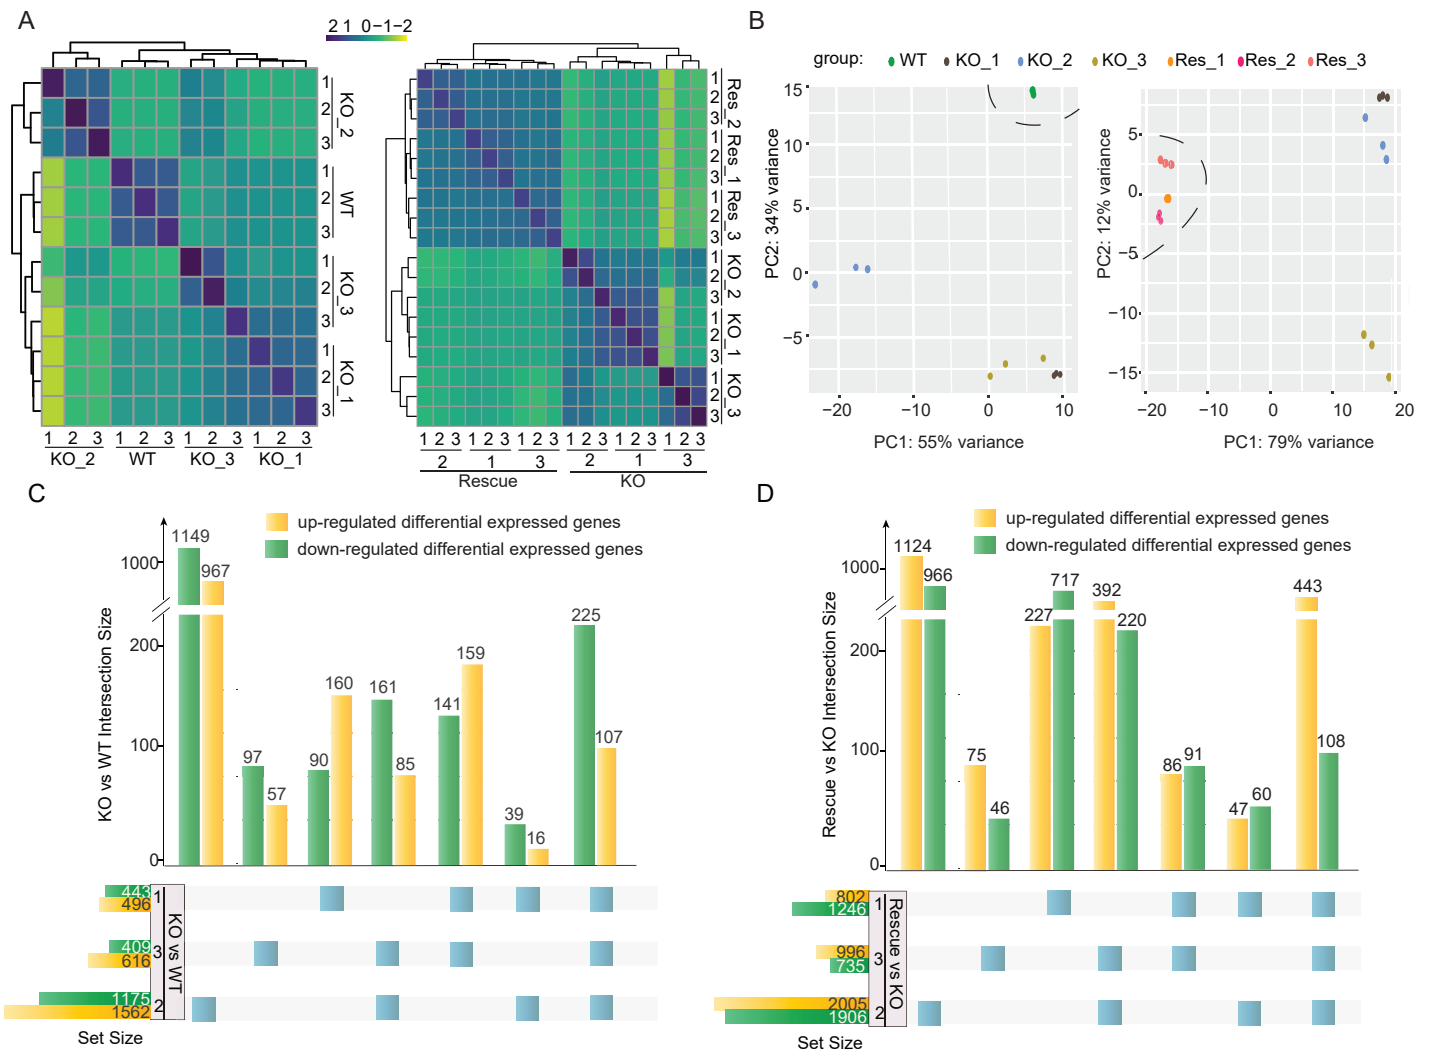

Figure S2

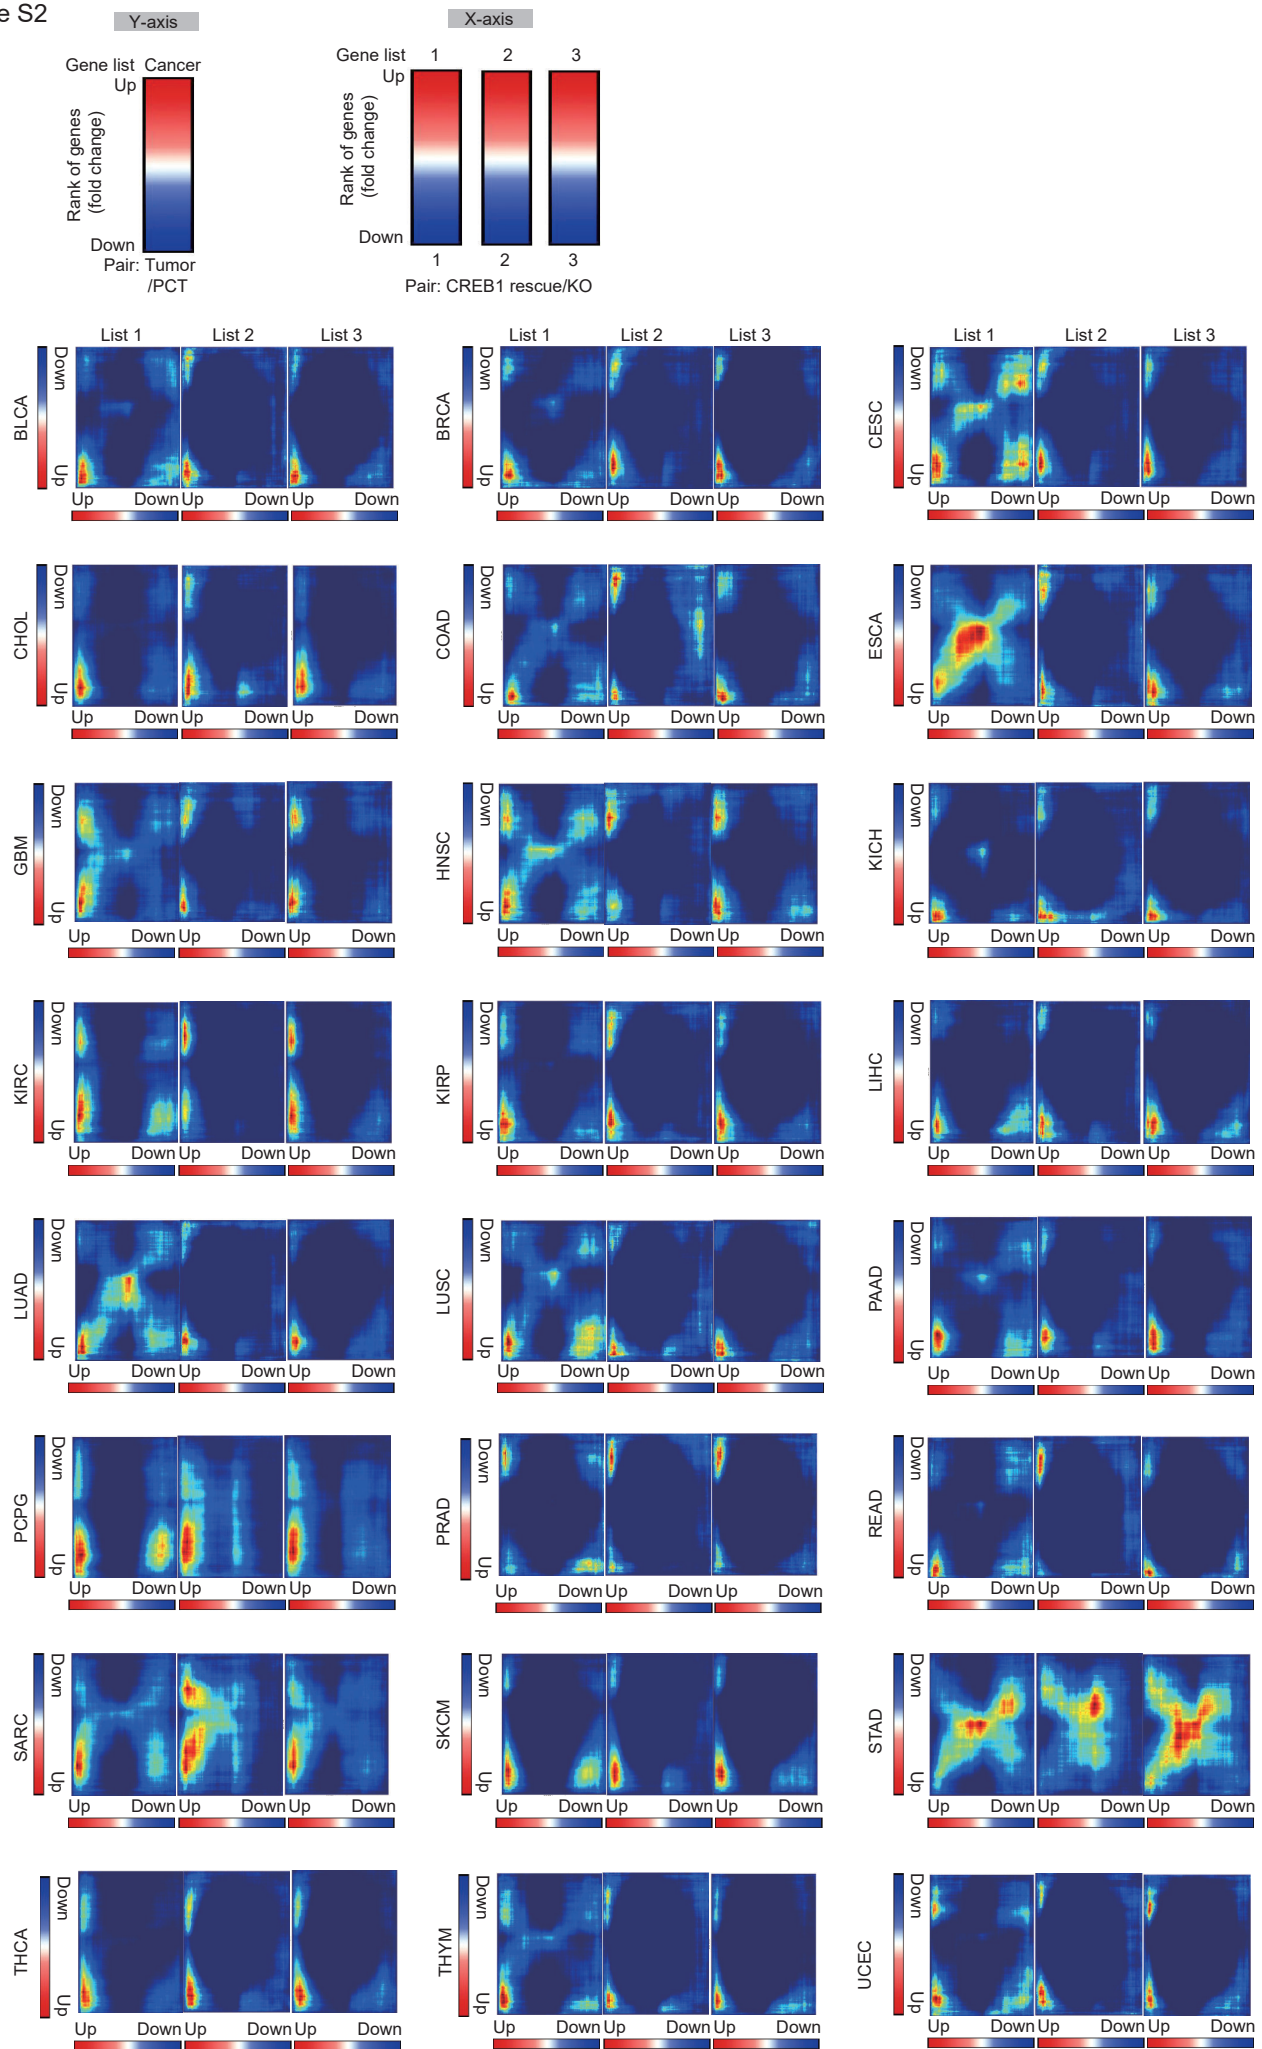



Figure S4

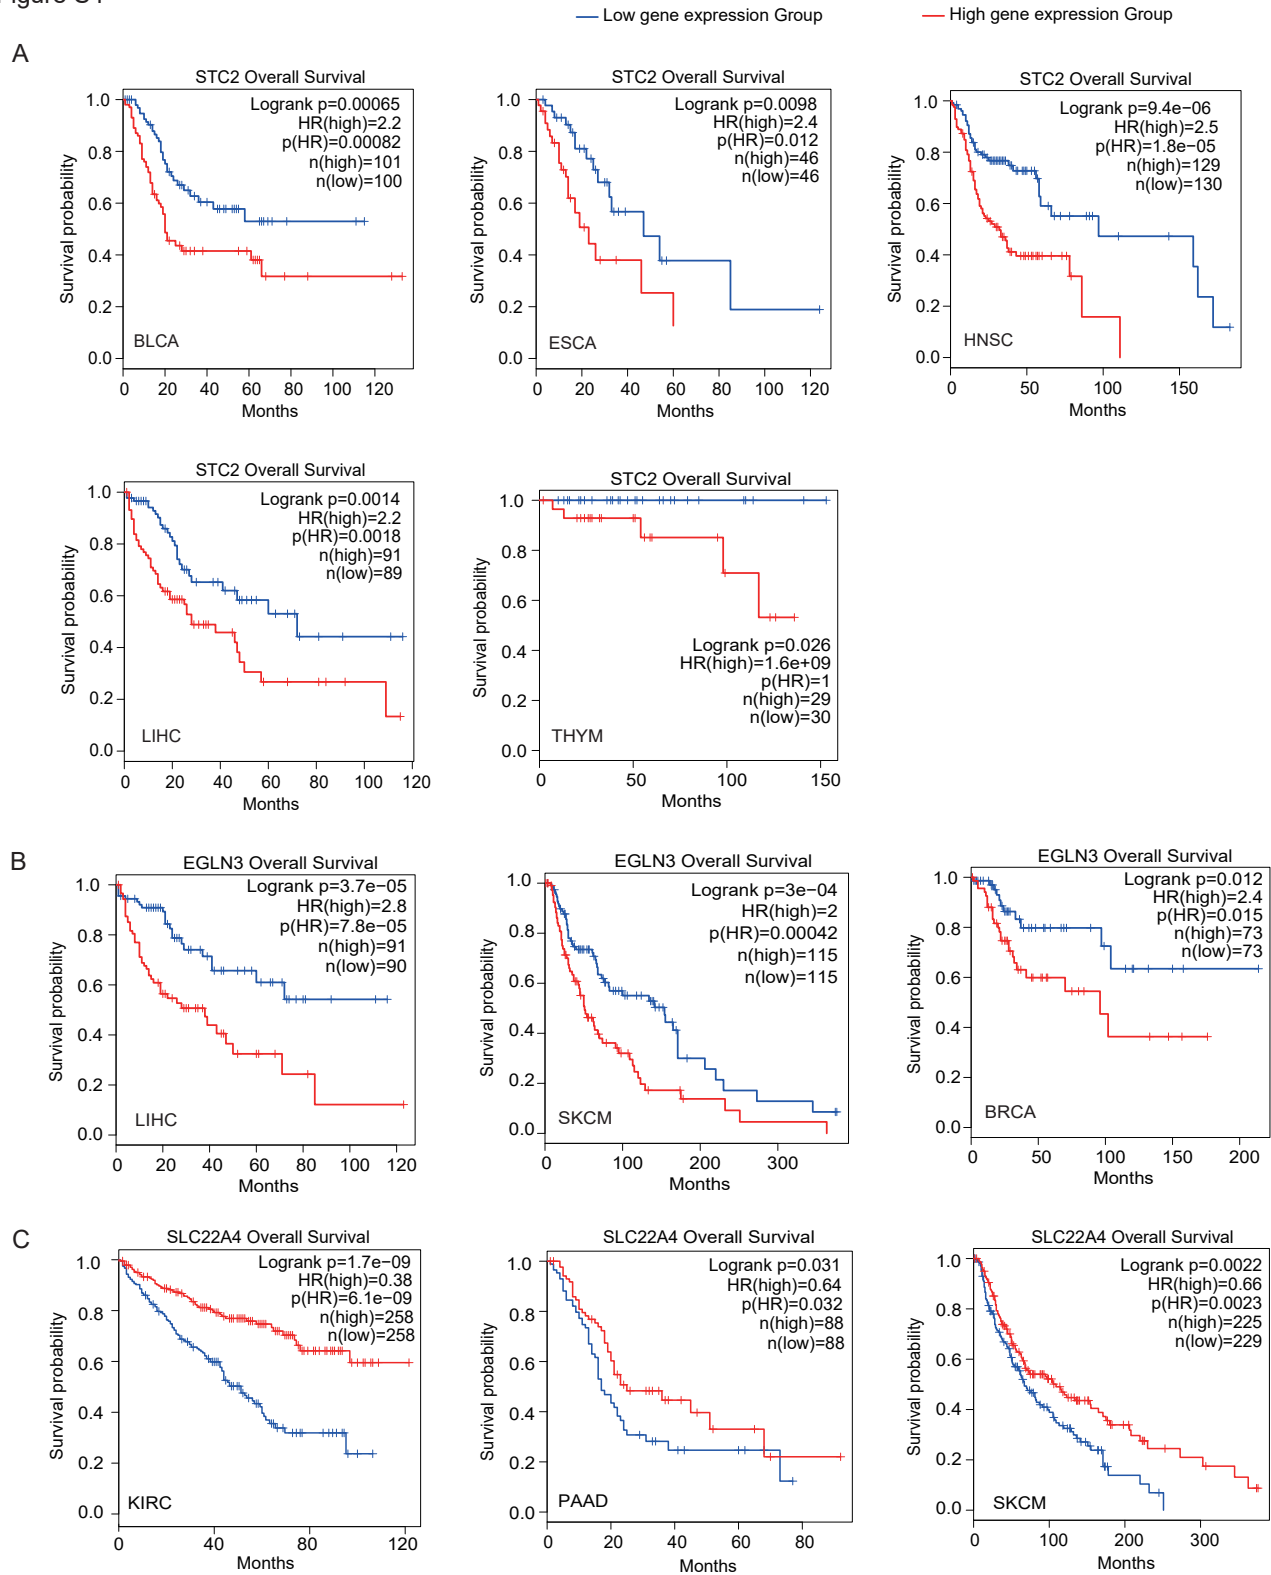

Supplement: 12935_2021_2224_MOESM1_ESM.pdf [file 12935_2021_2224_MOESM1_ESM.pdf]
